# Supplementary material for: Conservation of the enzyme-like activity and biocompatibility of CeO2 nanozymes in simulated body fluids
Source: Royal Society of Chemistry journal article supplement (doi:10.1039/d3nr03524g), 2023-01-01
Supplement: d3nr03524g1.pdf [file d3nr03524g1.pdf]

## Supporting Information

### Conservation of the Enzyme-like Activity and Biocompatibility of CeO<sub>2</sub> Nanozymes in Simulated Body Fluids (Saliva, Gastric, Intestinal, Lung)

Muling Zeng<sup>a,‡</sup>, Xu Zhang<sup>a,‡</sup>, Jie Tang<sup>a,‡</sup>, Xingfei Liu<sup>a</sup>, Yichao Lin<sup>a</sup>, Dongdong Guo<sup>a</sup>, Yuping Zhang<sup>a</sup>, Shijie Ju<sup>a</sup>, Guillermo Fernández-Varo<sup>b,c,d</sup>, Ya-Chao Wang<sup>e,\*</sup>, Xiangyu Zhou<sup>f,\*</sup>, Gregori Casals<sup>b,c,d,g,\*</sup>, Eudald Casals<sup>a,\*</sup>

<sup>a</sup> School of Biotechnology and Health Sciences, Wuyi University, Jiangmen 529020, China.

<sup>b</sup> Biochemistry and Molecular Genetics Department, Hospital Clínic of Barcelona, Barcelona 08036, Spain.

<sup>c</sup> Institut d'Investigacions Biomèdiques August Pi i Sunyer (IDIBAPS), Barcelona, Spain.

<sup>d</sup> Centro de Investigación Biomédica en Red de Enfermedades Hepáticas y Digestivas (CIBERehd), Barcelona, Spain.

<sup>e</sup> The Institute of Translational Medicine, The First Affiliated Hospital of Shenzhen University, Shenzhen Second People's Hospital, Shenzhen 518035, China.

<sup>f</sup> Obstetrics and Gynecology Hospital of Fudan University, Shanghai Medical College, State Key Lab of Genetic Engineering, Fudan University, Shanghai 200011, China.

<sup>g</sup> Department of Fundamental Care and Medical-Surgical Nursing, Faculty of Medicine and Health Sciences, University of Barcelona, Barcelona 08007, Spain.

‡ These authors contributed equally to this study.

\* Corresponding authors e-mail:

Ya-Chao Wang: [yachao.wang@uk-essen.de](mailto:yachao.wang@uk-essen.de)

Xiangyu Zhou: [zhou\\_xiangyu@fudan.edu.cn](mailto:zhou_xiangyu@fudan.edu.cn)

Gregori Casals: [casals@clinic.cat](mailto:casals@clinic.cat)

Eudald Casals: [wyuchemecm@126.com](mailto:wyuchemecm@126.com)

## Table of Contents.

### Supporting Figures

|                                                                                                                                                                    |    |
|--------------------------------------------------------------------------------------------------------------------------------------------------------------------|----|
| Figure S1. Additional TEM images and size distribution analysis.....                                                                                               | 3  |
| Figure S2. TEM images of the evolution of CeO <sub>2</sub> NZs in the different simulated body fluids and CCM.....                                                 | 4  |
| Figure S3. Study of the dissolution of the NZs in the different simulated body fluids and CCM by ICP-MS.....                                                       | 5  |
| Figure S4. XPS analysis of the CeO <sub>2</sub> NZs and CeO <sub>2</sub> NZs@mSiO <sub>2</sub> incubated 7 days in the different physiological fluids and CCM..... | 6  |
| Figure S5. Cell viability in human HepG2 cells incubated with the as-synthesized CeO <sub>2</sub> NZs and CeO <sub>2</sub> NZs@mSiO <sub>2</sub> .....             | 8  |
| Figure S6. Hydrodynamic diameter of NZs incubated up to 7 days with either Foetal Bovine Serum (FBS) or Human Serum (HS).....                                      | 9  |
| Figure S7. UV-VIS spectra evolution of NZs incubated up to 7 days with either FBS or HS.....                                                                       | 10 |
| Figure S8. Cell viability of NZs after being dispersed up to 7 days with either FBS or HS.....                                                                     | 11 |
| Figure S9. UV-VIS spectra of the TMB oxidation tests.....                                                                                                          | 12 |

### Supporting Table

|                                                                                                                                                                                   |    |
|-----------------------------------------------------------------------------------------------------------------------------------------------------------------------------------|----|
| Table S1. Evolution of the Zeta Potential of the CeO <sub>2</sub> NZs and CeO <sub>2</sub> NZs@mSiO <sub>2</sub> exposed to the simulated body fluids and CCM during 15 days..... | 13 |
|-----------------------------------------------------------------------------------------------------------------------------------------------------------------------------------|----|

**Figure S1. Additional TEM images and size distribution analysis.**

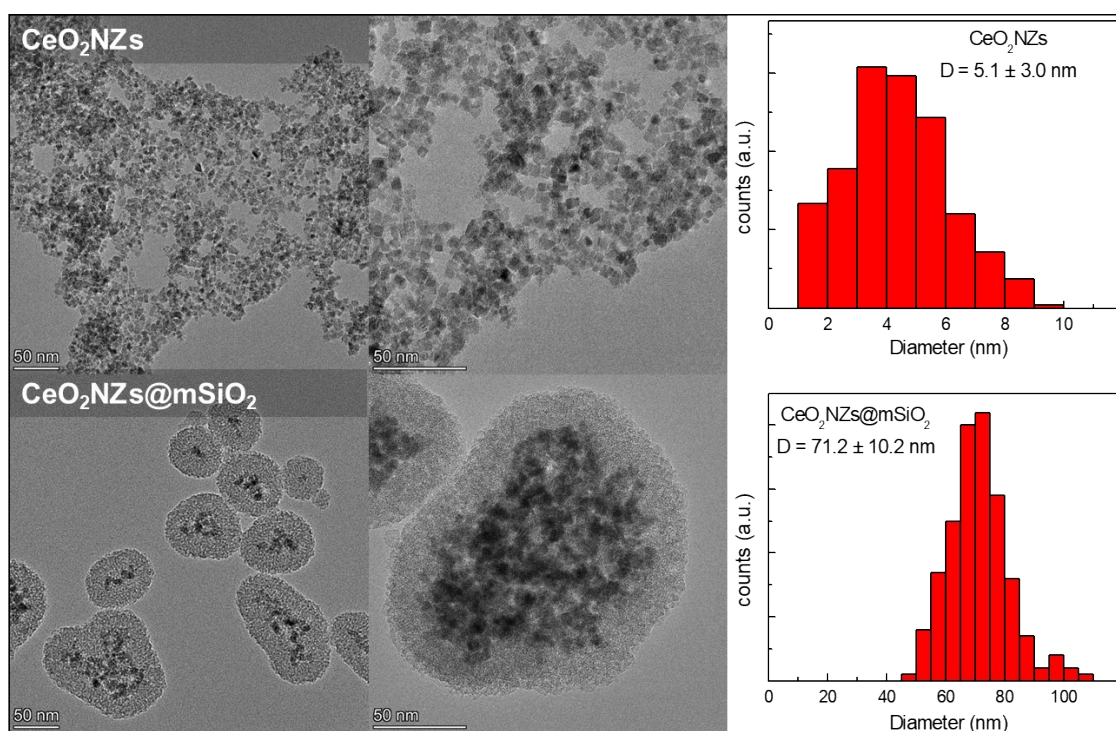

**Figure S1.** Additional TEM images at different magnifications and image analysis of the size distribution using Image J software (counting more than 500 particles) of the  $\text{CeO}_2\text{NZs}$  (upper row) and the  $\text{CeO}_2\text{NZs@mSiO}_2$ NPs (lower row).

**Figure S2.** TEM images of the evolution of CeO<sub>2</sub>NZs in the different simulated body fluids and CCM.

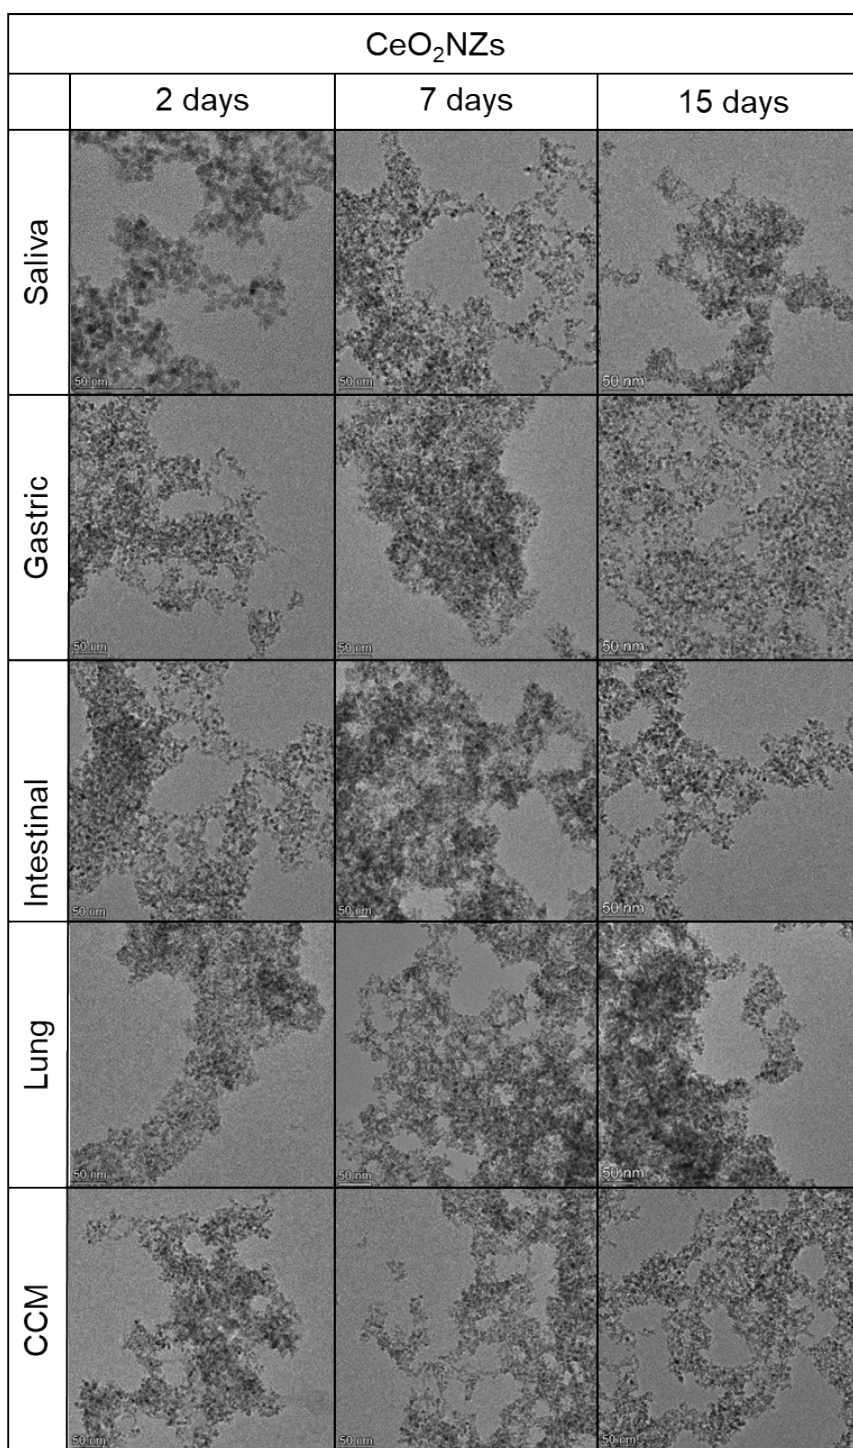

**Figure S2.** TEM images at different time points of CeO<sub>2</sub>NZs dispersed in the simulated body fluids and CCM. As discussed in the paper, CeO<sub>2</sub>NZs electrostatically stabilized (as is the case for similar metal oxide nanoparticles) agglomerate in the TEM grid during the drying process making difficult to observe modifications over time by this technique.

Figure S3. Study of the dissolution of the NZs in the different simulated body fluids and CCM by ICP-MS.

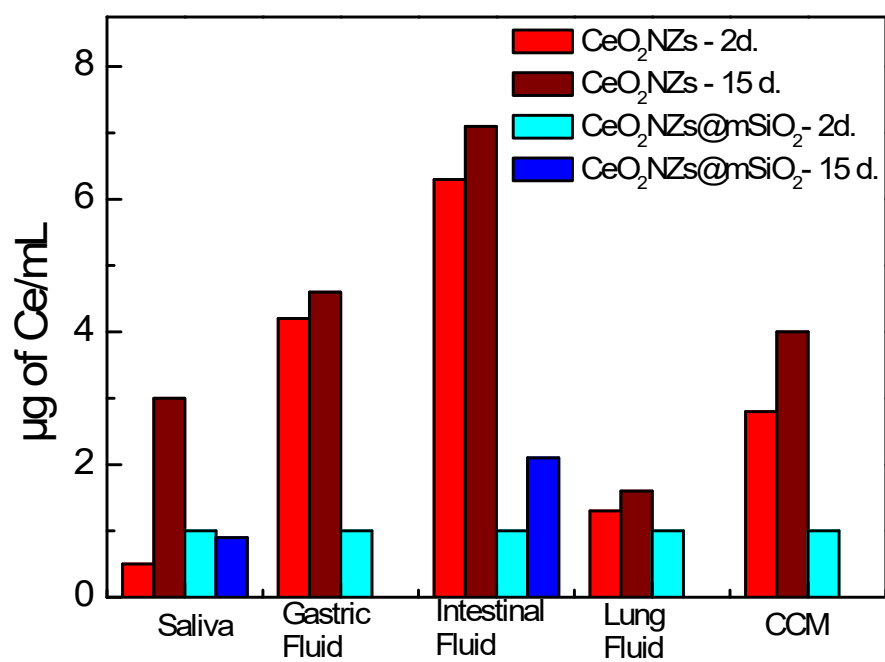

**Figure S3.** Concentration of Ce ions in the supernatants of the CeO<sub>2</sub>NZs and CeO<sub>2</sub>NZs@mSiO<sub>2</sub> after being exposed at 81.4 µg of Ce/ml (100 µg of CeO<sub>2</sub>/ml) in the different body fluids and CCM for 2 and 15 days as determined by ICP-MS.

Figure S4. XPS analysis of the CeO<sub>2</sub>NZs and CeO<sub>2</sub>NZs@mSiO<sub>2</sub> incubated 7 days in the different physiological fluids and CCM.

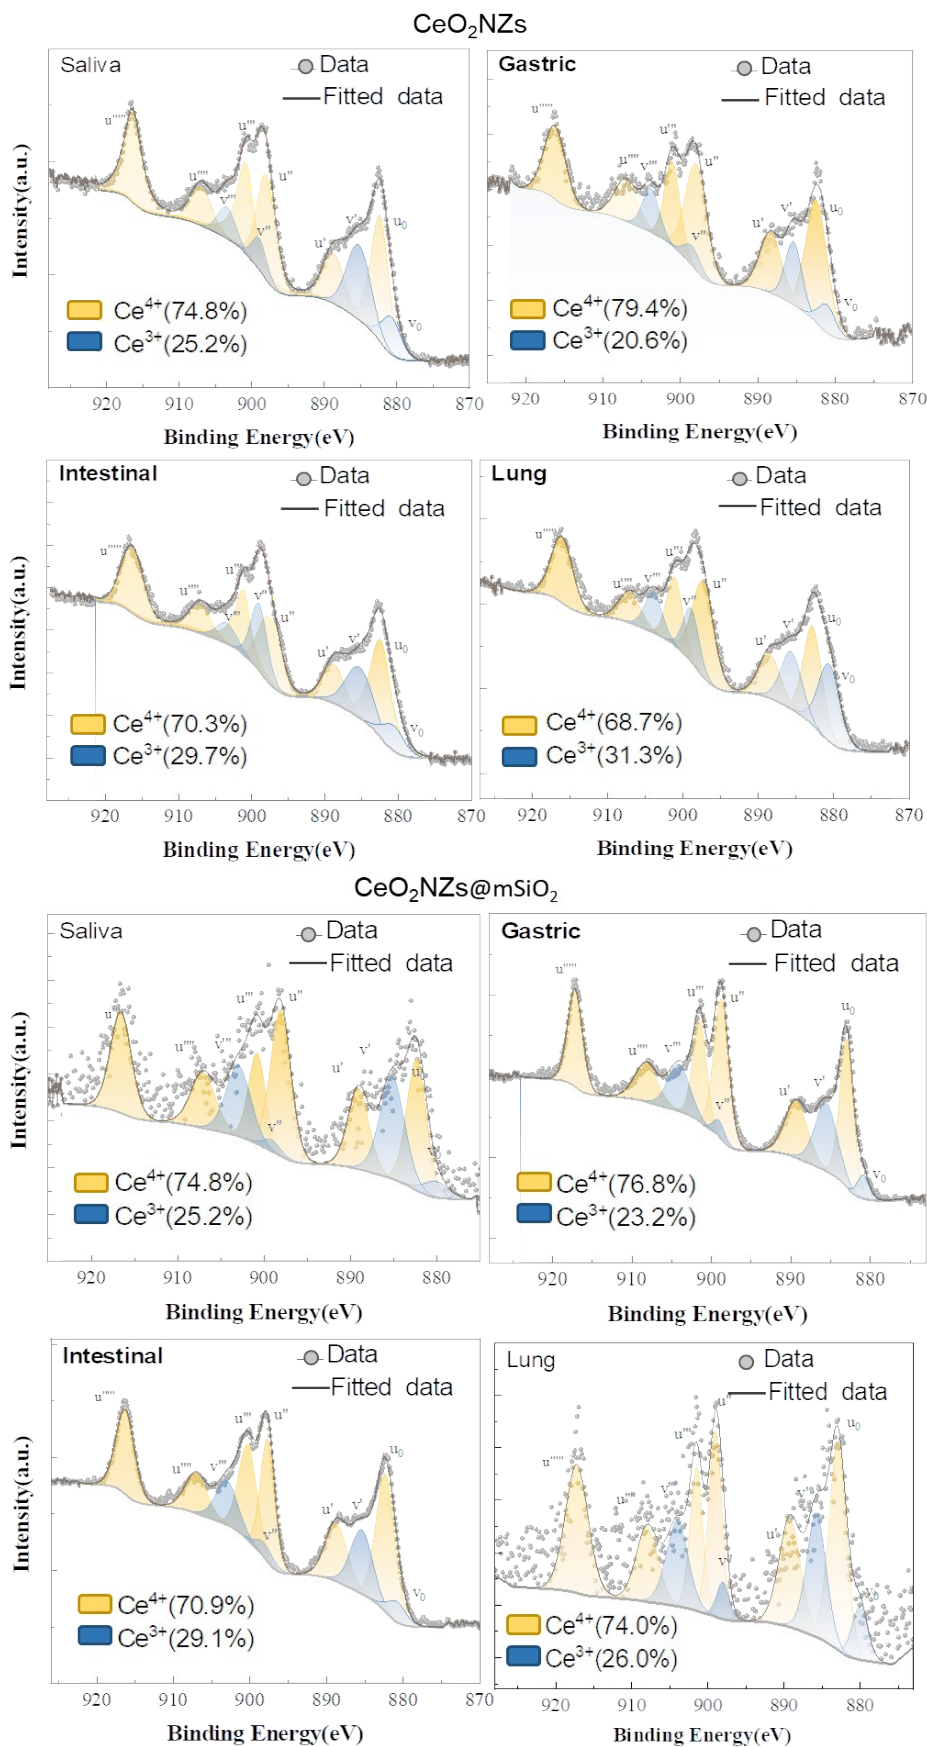

**Figure S4.** Ce 3d core-level spectra of CeO<sub>2</sub>NZs and CeO<sub>2</sub>NZs@mSiO<sub>2</sub> after being exposed 7 days in the different body fluids and CCM, with peaks described as v0, v', v'', v''' (in blue) related to Ce<sup>3+</sup> and peaks described as u0, u', u'', u''', u'''' (in yellow) to Ce<sup>4+</sup> oxidation states. Percentage of Ce<sup>3+</sup> and Ce<sup>4+</sup> is calculated based on the non-linear least squares fitting.

Figure S5. Cell viability in human HepG2 cells incubated with the as-synthesized  $\text{CeO}_2\text{NZs}$  and  $\text{CeO}_2\text{NZs@mSiO}_2$ .

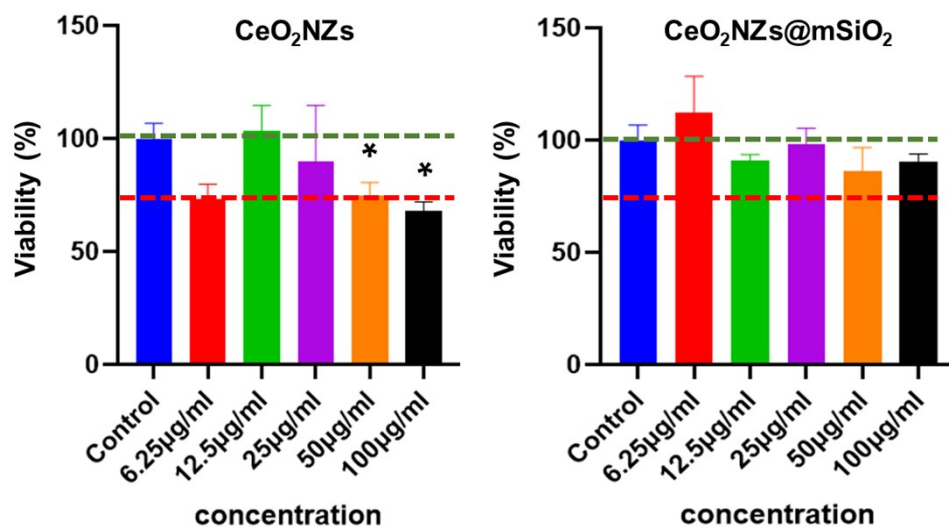

**Figure S5.** Cell viability in human HepG2 cell line of  $\text{CeO}_2\text{NZs}$  and  $\text{CeO}_2\text{NZs@mSiO}_2$  as synthesized. Five different concentrations of  $\text{CeO}_2\text{NZs}$  were tested in each set from left to right: 6.25, 12.5, 25, 50, and 100  $\mu\text{g}$  of  $\text{CeO}_2/\text{mL}$ . Green dashed lines indicate 100% control metabolic activity, while the red dashed lines indicate that the metabolic activity is decreased to 80%. The asterisk indicates data of significant difference vs control (100%) at  $p < 0.05$ .



**Figure S6. Hydrodynamic diameter of NZs incubated up to 7 days with either Foetal Bovine Serum (FBS) or Human Serum (HS).**

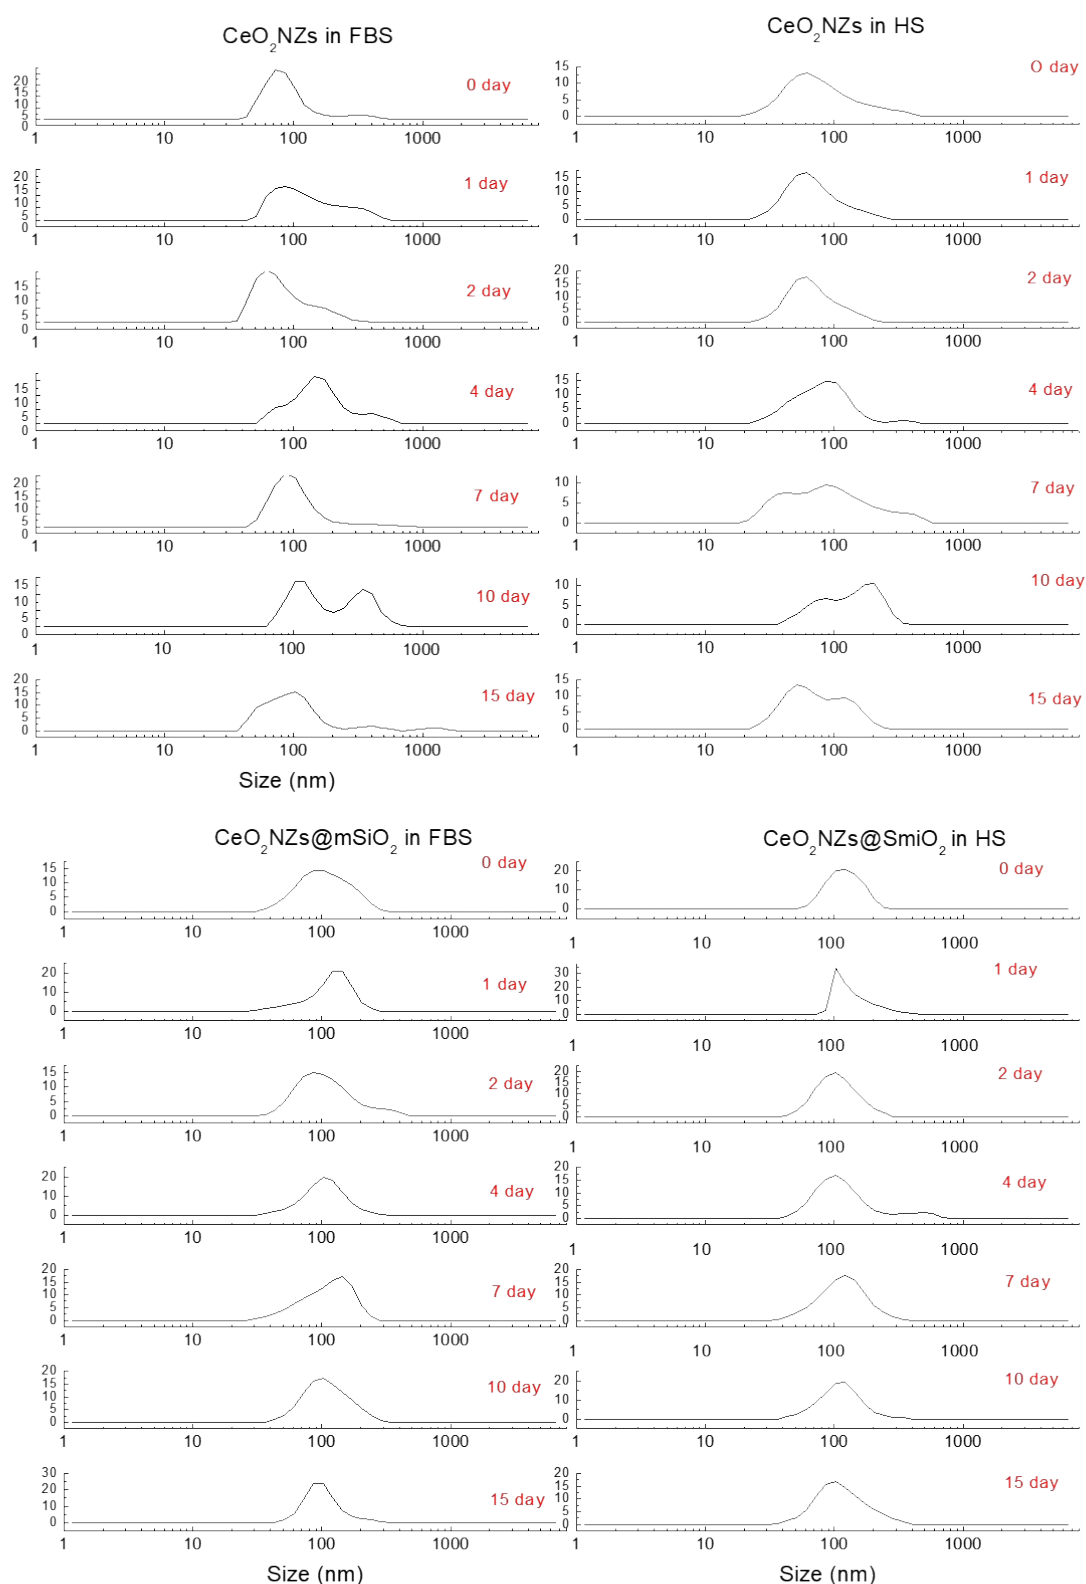

**Figure S6.** Hydrodynamic diameter of  $\text{CeO}_2\text{NZs}$  and  $\text{CeO}_2\text{NZs@mSiO}_2$  dispersed in either FBS or HS at a final concentration of  $50 \mu\text{g}$  of  $\text{CeO}_2/\text{ml}$ , which have been recovered and purified from the media at different time points. Day “0” indicates that the nanomaterials have been dispersed in the fluid for 30 minutes prior to their purification and measurements. Note that another set of experiments (not the one in the main manuscript) have been performed with FBS for this comparison.

**Figure S7.** UV-VIS spectra evolution of NZs incubated up to 7 days with either Foetal Bovine Serum (FBS) or Human Serum (HS)

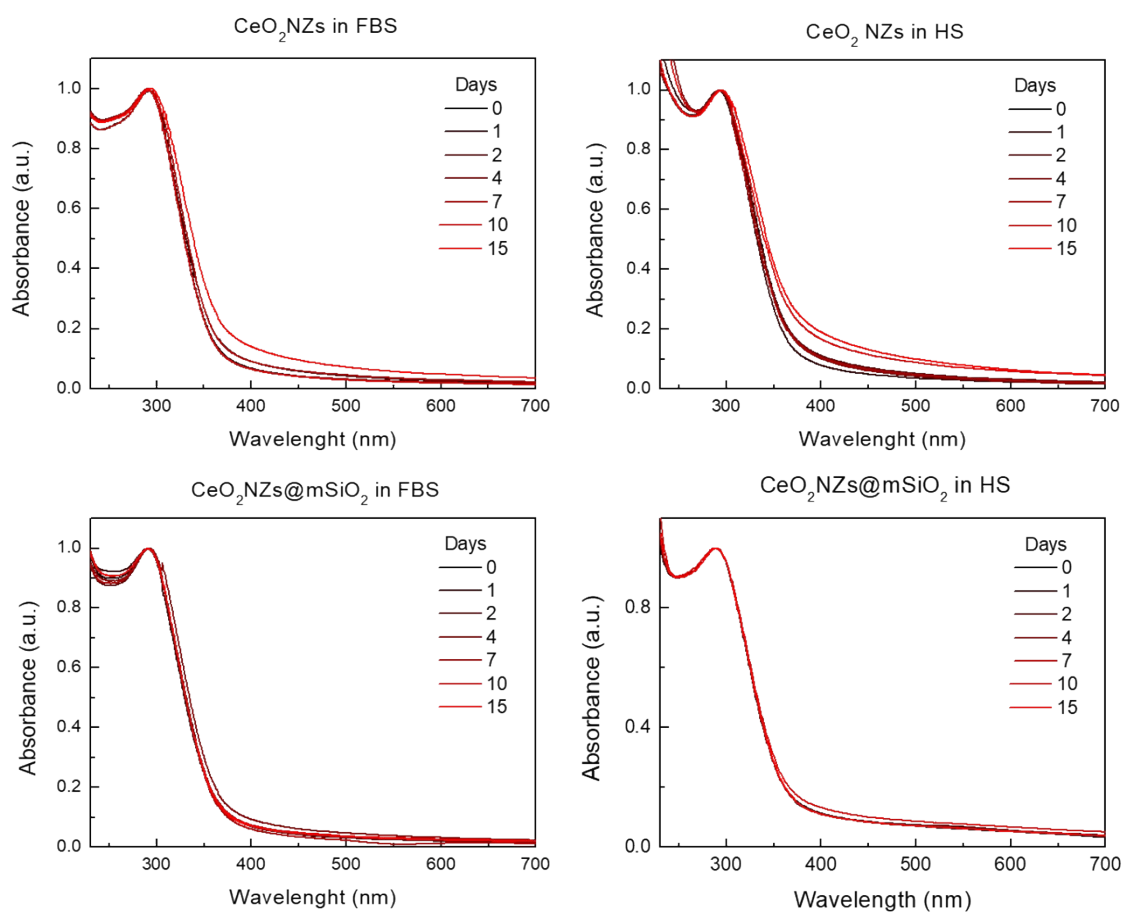

**Figure S7.** UV-VIS spectra of  $\text{CeO}_2\text{NZs}$  and  $\text{CeO}_2\text{NZs@mSiO}_2$  dispersed in either FBS or HS at a final concentration of  $50\text{ }\mu\text{g}$  of  $\text{CeO}_2/\text{ml}$ , which have been recovered and purified from the media at different time points. Day "0" indicates that the nanomaterials have been dispersed in the fluid for 30 minutes prior to their purification and measurements. Note that another set of experiments (not the one in the main manuscript) have been performed with FBS for this comparison.

**Figure S8. Cell viability of NZs after being dispersed up to 7 days with either Foetal Bovine Serum (FBS) or Human Serum (HS)**

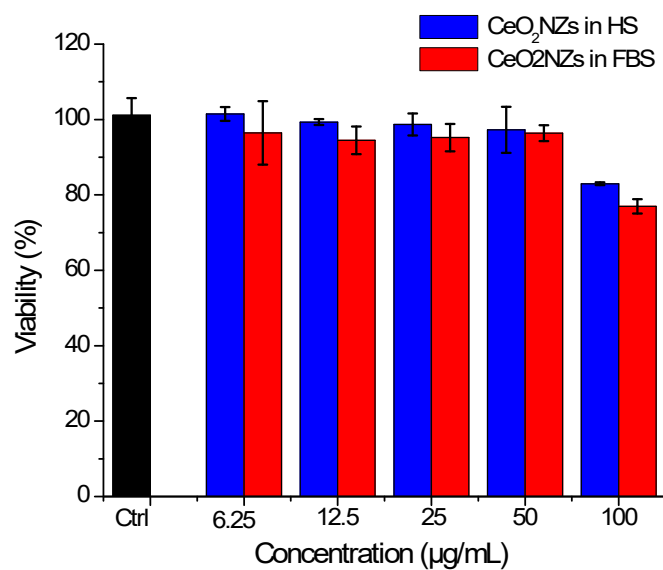

**Figure S8. Cell viability in human hepatic cells (HepG2 cells) of  $\text{CeO}_2\text{NZs}$  and  $\text{CeO}_2\text{NZs@mSiO}_2$  dispersed up to 7 days in either FBS or HS. Five different concentrations of both NZs were tested in each set from left to right: 6.25, 12.5, 25, 50, and 100  $\mu\text{g}$  of  $\text{CeO}_2/\text{mL}$ .**

**Figure S9. UV-VIS spectra of the TMB oxidation test**

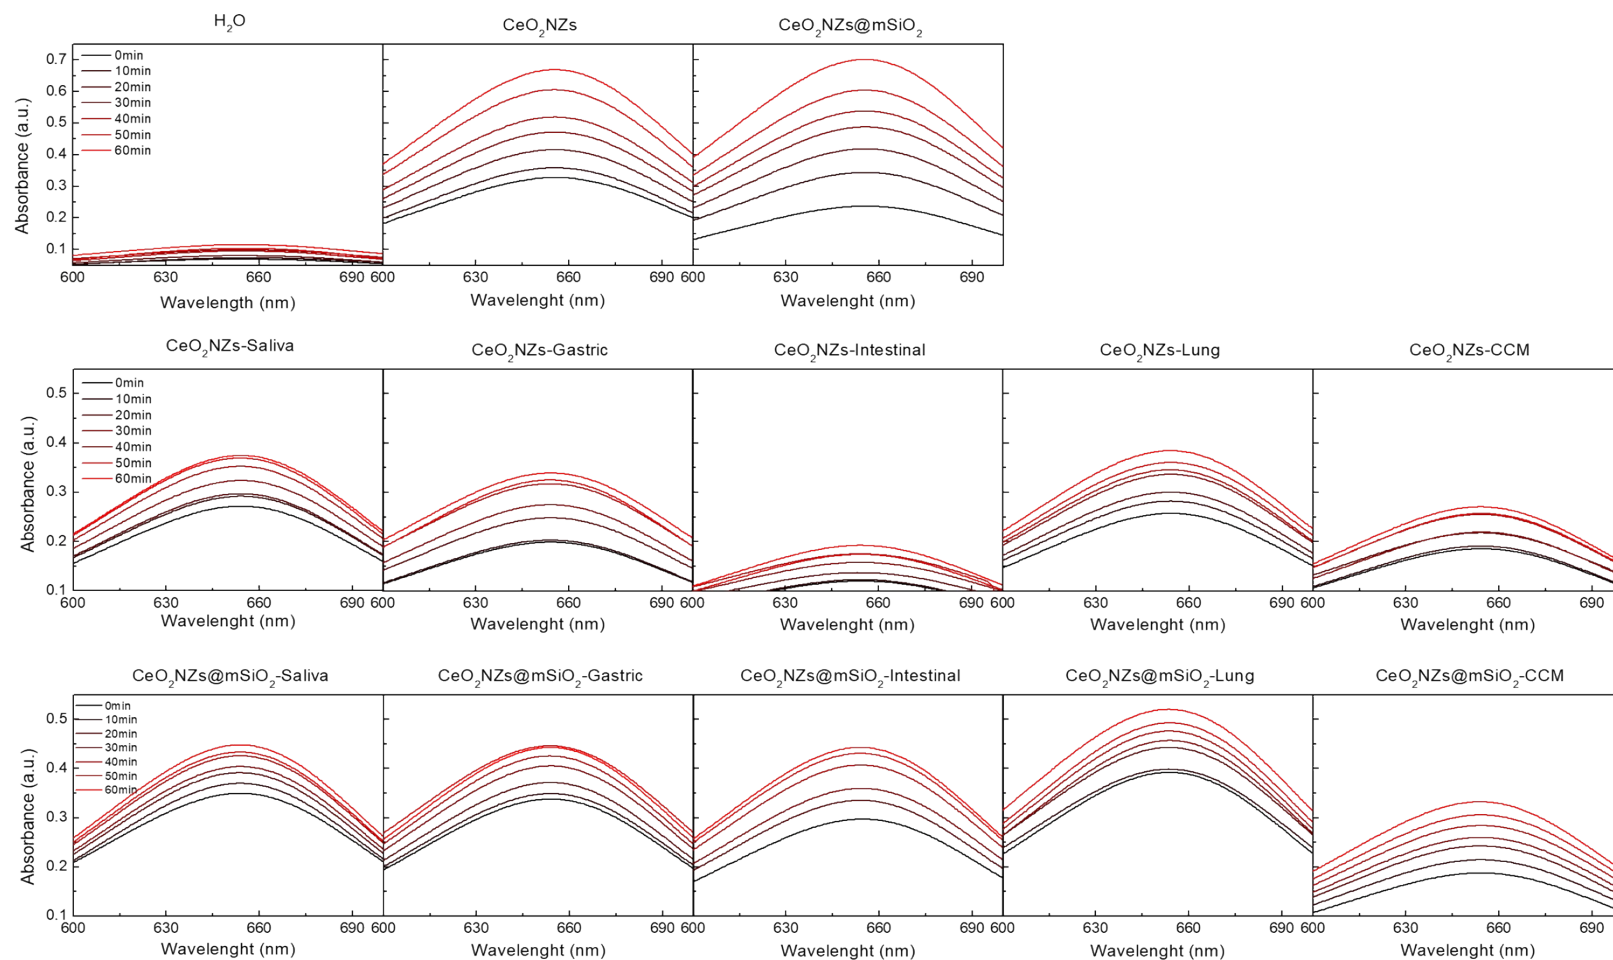

**Figure S5. UV-VIS spectra of  $\text{CeO}_2\text{NZs}$  and  $\text{CeO}_2\text{NZs@mSiO}_2$  as synthesized (upper row) and incubated in the simulated body fluids and CCM (lower rows) which correspond to the TMB oxidation test, Figure 7 of the main manuscript.**

**Table S1. Evolution of the Zeta Potential of the CeO<sub>2</sub>NZs and CeO<sub>2</sub>NZs@mSiO<sub>2</sub> exposed to the simulated body fluids and CCM during 15 days**

|                                            |                  | Z-Potential (mv) |        |        |        |        |        |         |         |
|--------------------------------------------|------------------|------------------|--------|--------|--------|--------|--------|---------|---------|
|                                            |                  | Control          | 0 days | 1 days | 2 days | 4 days | 7 days | 10 days | 15 days |
| <b>CeO<sub>2</sub>NZs</b>                  | Saliva           | -20.1            | -19.3  | -12.4  | -12.0  | -16.2  | -12.5  | -19.8   | -13.8   |
|                                            | Gastric Fluid    | -14.5            | -13.6  | -16.1  | -14.8  | -14.4  | -12.3  | -12.2   | -17.8   |
|                                            | Intestinal Fluid | -5.9             | -4.9   | -12.1  | -5.1   | -7.0   | -9.4   | -9.5    | -20.2   |
|                                            | Lung Fluid       | -16.0            | -14.5  | -19.8  | -19.0  | -18.3  | -14.0  | -14.9   | -8.5    |
|                                            | CCM              | -8.7             | -11.2  | -13.7  | -16.6  | -11.8  | -15.1  | -9.5    | -17.3   |
| <b>CeO<sub>2</sub>NZs@mSiO<sub>2</sub></b> | Saliva           | -20.1            | -10.2  | -10.4  | -13.5  | 13.2   | 10.3   | 13.2    | 11.3    |
|                                            | Gastric Fluid    | -14.5            | -10.4  | -16.7  | -16.8  | -19.2  | -14.6  | -16.4   | -16.1   |
|                                            | Intestinal Fluid | -5.9             | -13.1  | -13.5  | -11.7  | -11.1  | -11.4  | -12.4   | -12.0   |
|                                            | Lung Fluid       | -16.0            | -12.6  | -14.2  | -11.0  | -17.0  | -13.5  | -14.1   | -13.4   |
|                                            | CCM              | -8.7             | -10.4  | -10.4  | -12.7  | -10.0  | -13.7  | -15.5   | -12.7   |
